# Supplementary figures and images for: A Generic Graph-Based Method for Flexible Aspect-Opinion Analysis of Complex Product Customer Feedback
Source: MDPI journal article supplement (doi:10.3390/info13030118), 2022-02-28

Aspect classes

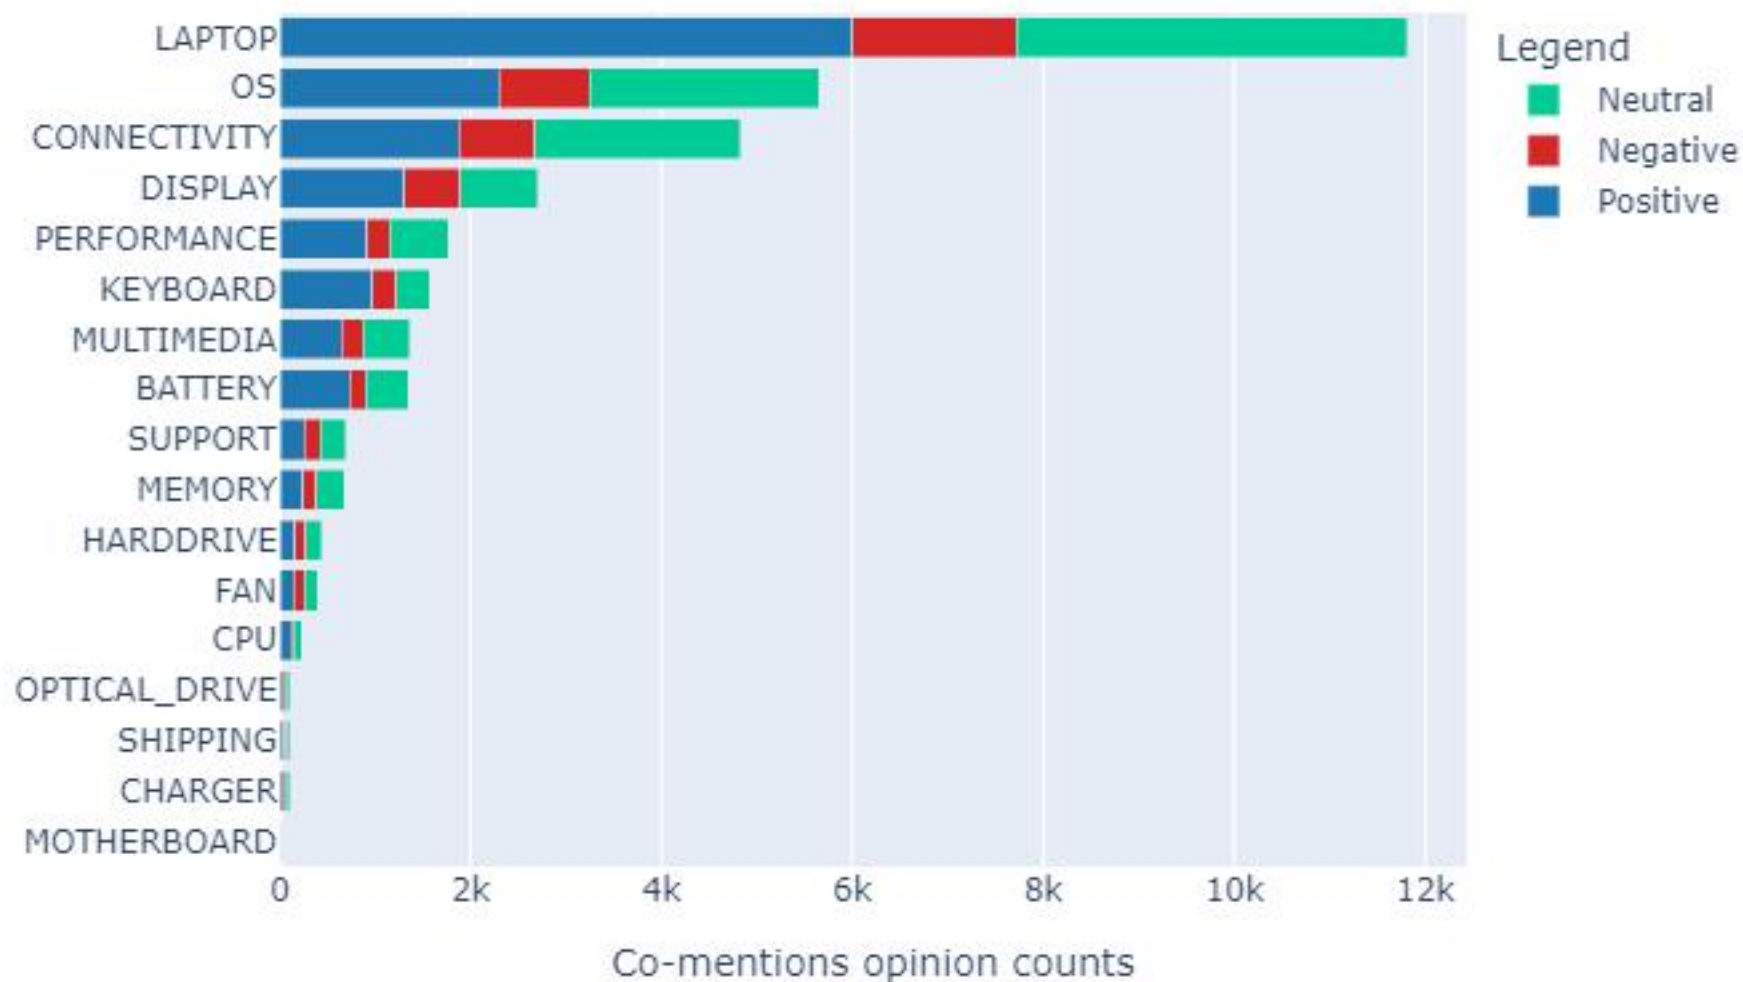

Supplement: s1 [file s1]
